- effects of anesthesia and 100 per cent oxygen on the functional residual capacity of the lungs. *ANESTHESIOLOGY* 32:521-529, 1970
7. Bergman NA: Distribution of inspired gas during anesthesia and artificial ventilation. *J Appl Physiol* 18:1085-1089, 1963
  8. Westbrook PR, Stubbs SE, Sessler AD, et al: Effects of anesthesia and muscle paralysis on respiratory mechanics in normal man. *J Appl Physiol* 34:81-86, 1973
  9. Rehder K, Hatch DJ, Sessler AD, et al: Effects of general anesthesia, muscle paralysis, and mechanical ventilation on pulmonary nitrogen clearance. *ANESTHESIOLOGY* 35:591-601, 1971
  10. Rehder K, Sessler AD: Function of each lung in spontaneously breathing man anesthetized with thiopental-meperidine. *ANESTHESIOLOGY* 38:320-327, 1973
  11. West JB, Jones NL: Effects of changes in topographical distribution of lung blood flow on gas exchange. *J Appl Physiol* 20:825-835, 1965
  12. Rehder K, Hatch DJ, Sessler AD, et al: The function of each lung of anesthetized and paralyzed man during mechanical ventilation. *ANESTHESIOLOGY* 37:16-26, 1972
  13. Agostoni E, D'Angelo E, Bonanni MV: Topography of pleural surface pressure above resting volume in relaxed animals. *J Appl Physiol* 29:297-306, 1970
  14. Agostoni E, Miserocchi G: Vertical gradient of transpulmonary pressure with active and artificial lung expansion. *J Appl Physiol* 29:705-712, 1970
  15. Bitter HS, Rahn H: Redistribution of alveolar blood flow with passive lung distension. *Studies in Respiratory Physiology* (Technical Report 56-466). Third series. Wright Air Development Center, 1956
  16. Folkow B, Pappenheimer JR: Components of the respiratory dead space and their variation with pressure breathing and with bronchoactive drugs. *J Appl Physiol* 8:102-110, 1955
  17. Don HF, Wabba WM, Craig DB: Airway closure, gas trapping, and the functional residual capacity during anesthesia. *ANESTHESIOLOGY* 36:533-539, 1972
  18. Ashbaugh DG, Petty TL, Bigelow DB, et al: Continuous positive-pressure breathing (CPPB) in adult respiratory distress syndrome. *J Thorac Cardiovasc Surg* 57:31-40, 1969
  19. Kumar A, Falke KJ, Geffin B, et al: Continuous positive-pressure ventilation in acute respiratory failure: Effects on hemodynamics and lung function. *N Engl J Med* 283:1430-1436, 1970

## Obstetrics

**FETAL LUNG MATURITY** The ratio of lecithin to sphingomyelin in phospholipids extracted from amniotic fluid has been suggested as a useful index of fetal lung maturity. Since surfactant (a lecithin complex whose time of appearance in the lung is related to gestational age) is decreased in infants with hyaline membrane disease, delay in delivery of these infants has been advocated when the lecithin to sphingomyelin ratio (L/S) is found to be less than 1.5.

Amniotic fluid from 90 pregnant women was sampled. In 47, the amniotic fluid had L/S ratios below 1.5. Among the infants of these 47 mothers, five developed asphyxia or transient respiratory difficulty, two had hyaline membrane disease, and two were stillborn. In the group with L/S ratios above 1.5 (i.e., 43), four infants developed asphyxia or transient respiratory difficulty. Although the L/S ratio appears to be a reliable indicator of gestational age, it is not a clear indicator of fetal lung maturity or postpartum respiratory difficulties. (Nakamura, J.: *Total Lipids and the Lecithin-Sphingomyelin Ratio of Amniotic Fluid: An Antenatal Test of Lung Immaturity?* *Am. J. Obstet. Gynecol.* 113:363-366, 1972.)
